# Supplementary material
Source: MDPI journal article supplement (https://www.mdpi.com/search?q=metals-08-00465)
Supplement: s001 [file metals-08-00465-s001.pdf]

# Understanding the recovery of rare-earth elements by ammonium salts

## Supplementary Materials

Jamie P. Hunter <sup>1</sup>, Sara Dolezalova <sup>1</sup>, Bryne Ngwenya <sup>2</sup>, Carole A. Morrison <sup>1</sup> and Jason B. Love <sup>1,\*</sup>

<sup>1</sup> EaStCHEM School of Chemistry, University of Edinburgh, Edinburgh EH9 3FJ, UK

<sup>2</sup> School of Geosciences, University of Edinburgh, Edinburgh EH9 3FE

\* Correspondence: jason.love@ed.ac.uk; Tel.: +44 131 650 4762

|                                                                      |   |
|----------------------------------------------------------------------|---|
| Figure S1: Slope Analysis.....                                       | 1 |
| Figure S2: Back Extraction (Stripping) Studies of La, Nd and Dy..... | 1 |
| Figure S3: La and Dy Negative ion ESI-MS.....                        | 2 |
| Figure S4: Variable Temperature <sup>139</sup> La NMR.....           | 3 |
| Figure S5: Computational Outputs.....                                | 3 |
| Figure S6: Infrared Spectroscopy.....                                | 4 |

### Figure S1: Slope Analysis

Slope analysis from associated log *D* plots. (Left) the recovery of La, Nd and Dy (0.01 M) from a NaNO<sub>3</sub> (7 M) aqueous solution varying **IL** concentration (0.01-1.0 M) in toluene. (Right) The recovery of La, Nd and Dy (0.01 M) using **IL** (0.10 M) in toluene varying NaNO<sub>3</sub> concentration (1-7 M).

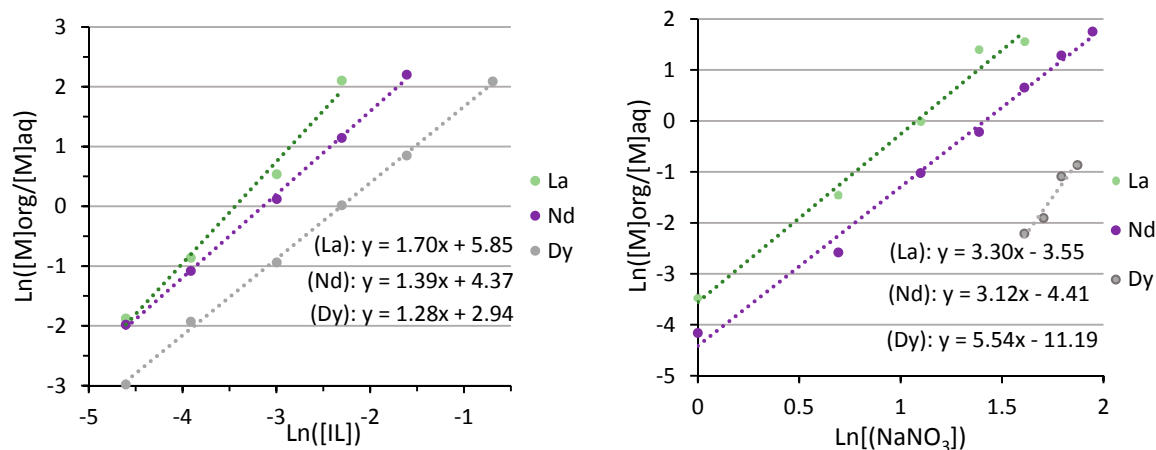

### Figure S2: Back Extraction (Stripping) Studies of La, Nd and Dy

The back extraction (stripping) of La, Nd, Dy from a loaded organic phase containing **IL** (0.1 M) using water and NaNO<sub>3</sub> solution (0-7 M). Interpolation used to aid the eye only.

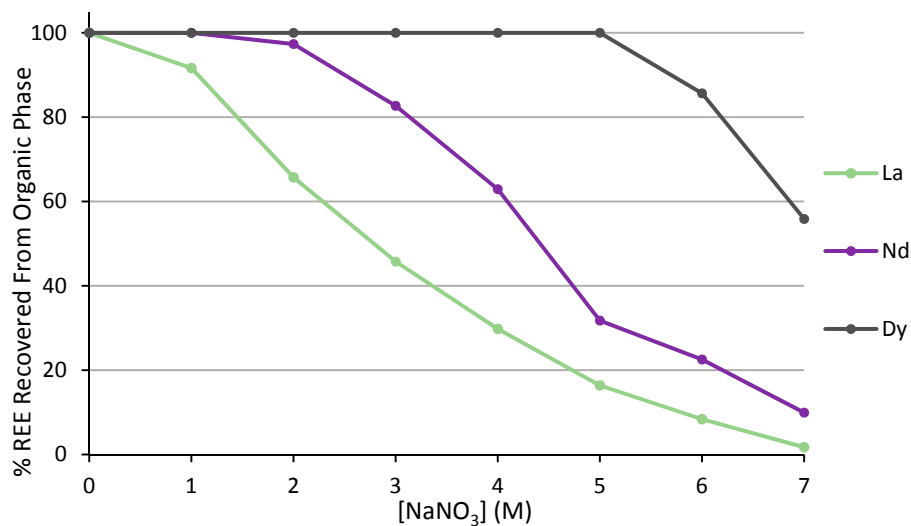

**Figure S3: La and Dy Negative ion ESI-MS**

Negative-ion mode ESI-MS of the **IL** organic phase (0.1 M **IL**) post-contact with a La or Dy aqueous phase diluted with methanol showing ions of  $\text{REE}(\text{NO}_3)_4(\text{IL})_n^-$ . La (Top) and Dy (Bottom) (0.05 M). Experimental negative-ion ESI-MS (red) compared with that calculated (black).

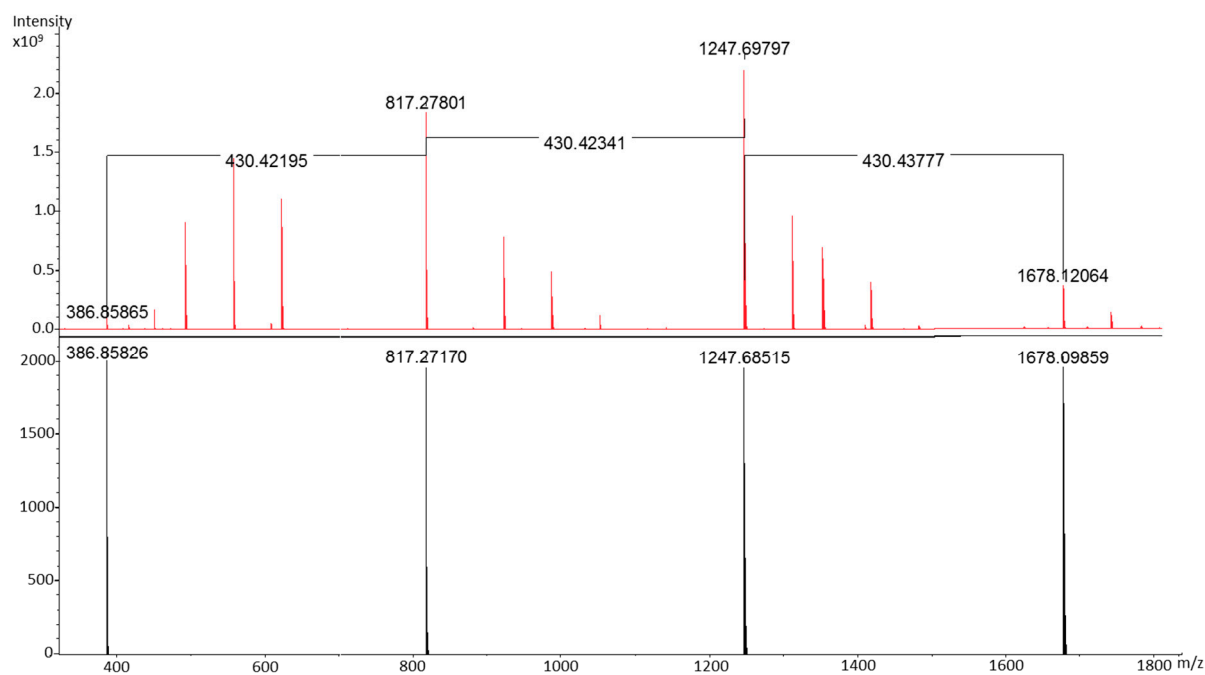

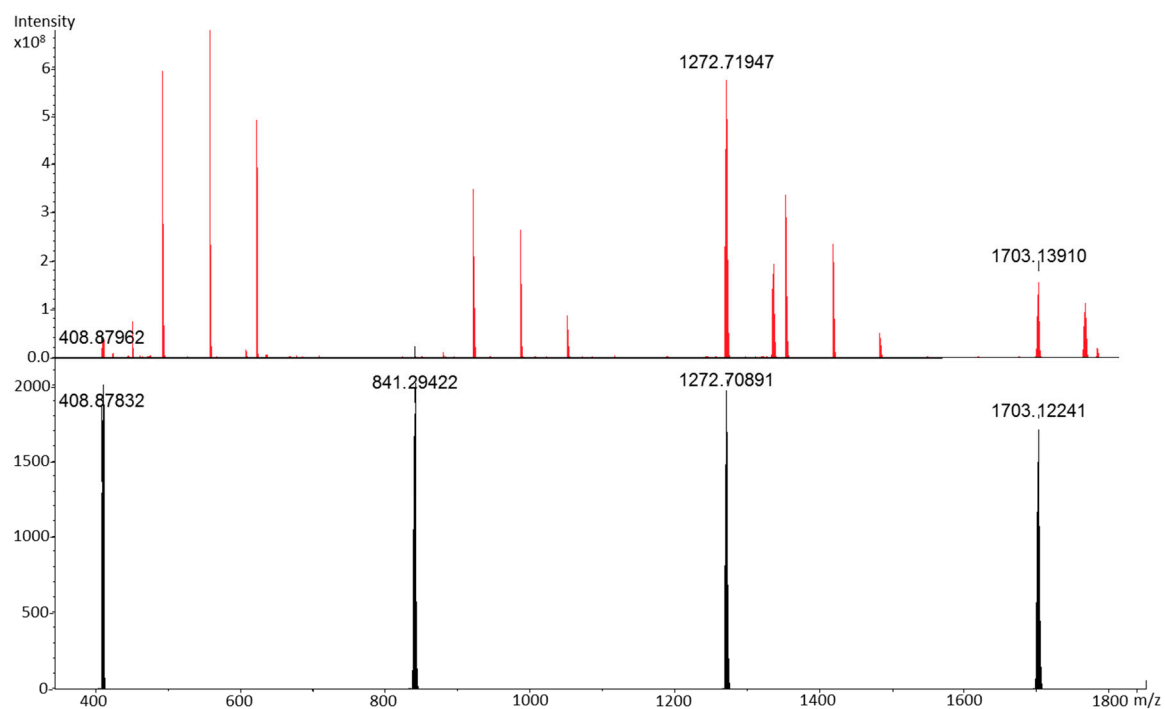

**Figure S4: Variable Temperature <sup>139</sup>La NMR**

<sup>139</sup>La NMR spectra of the La standard, LaCl<sub>3</sub> (0.01 M, 0.0 ppm) in D<sub>2</sub>O (purple) and the IL organic phase (0.05 M) after contact with a 0.05 M aqueous La solution obtained at -55 (dark blue), +5 (cyan), +25 (green), +45 (yellow), +65 °C (red).

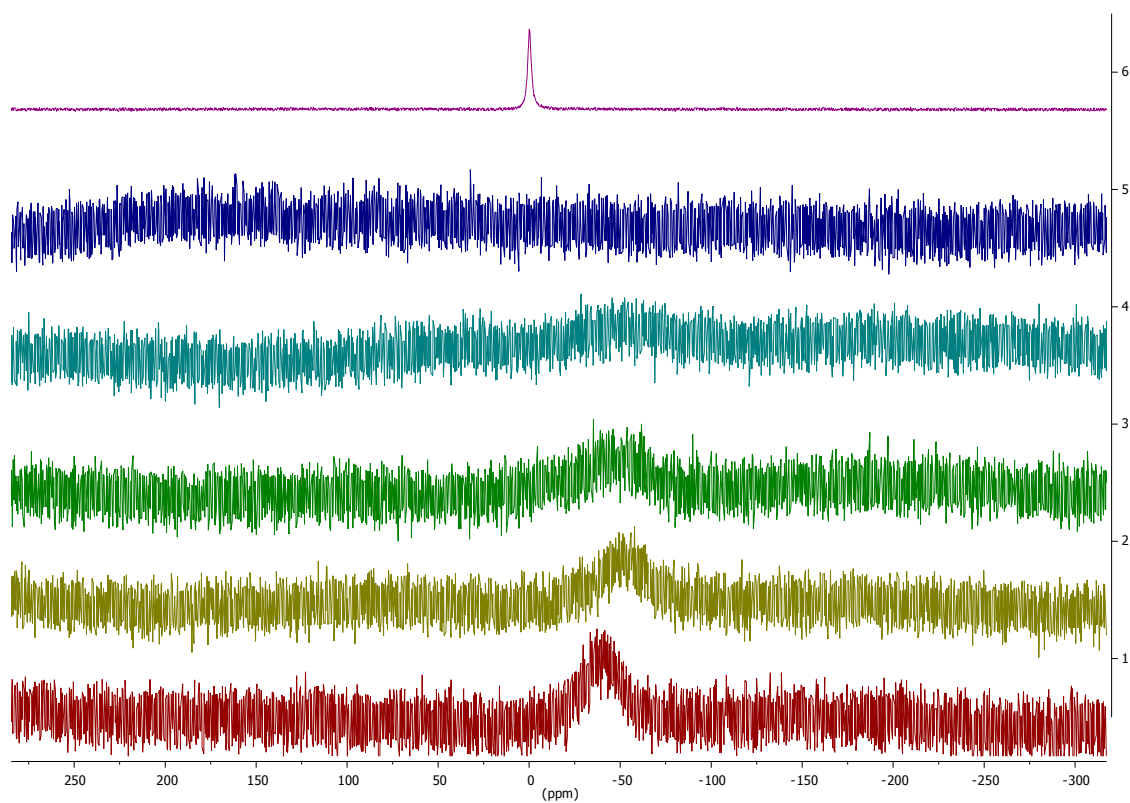

**Figure S5: Computational Outputs**

An output from classical MD simulations indicating how the average number of IL, water and nitrate associated with La increases as distance from La increases following formation of a La containing aggregate. On average, four  $\text{NO}_3^-$  anions are observed to be within 5.1 Å of the La centre, three  $\text{H}_2\text{O}$  molecules within 6.0 Å, and three nitrogen atoms from the encapsulating ammonium cations within 11 Å. All six  $\text{NO}_3^-$  are incorporated into the aggregate within 11 Å from the  $\text{La}^{3+}$  cation on average.

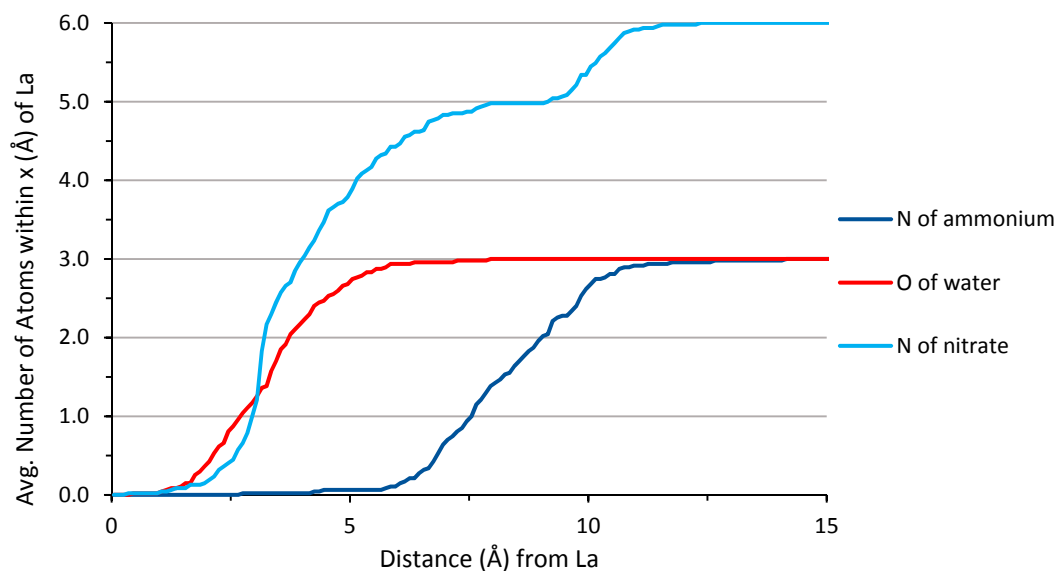

**Figure S6: Infrared Spectroscopy**

(Top) Infrared spectrum of the IL organic phase (0.05 M) after contact with a 0.05 M aqueous La solution. The IL organic phase pre-contact used as the background (Bottom). Peaks at 1328 and 1435  $\text{cm}^{-1}$  in the IL organic phase loaded with La assigned as symmetric and asymmetric N-O nitrate stretches. Peaks at 1339 and 1467  $\text{cm}^{-1}$  in the IL organic phase prior to La loading assigned as symmetric and asymmetric N-O nitrate stretches.

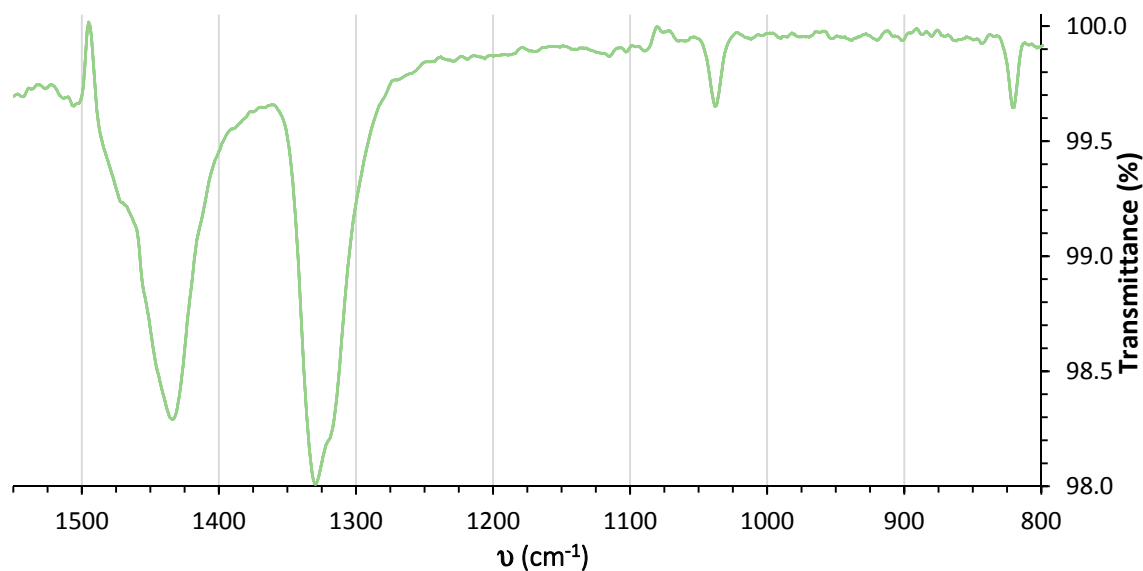

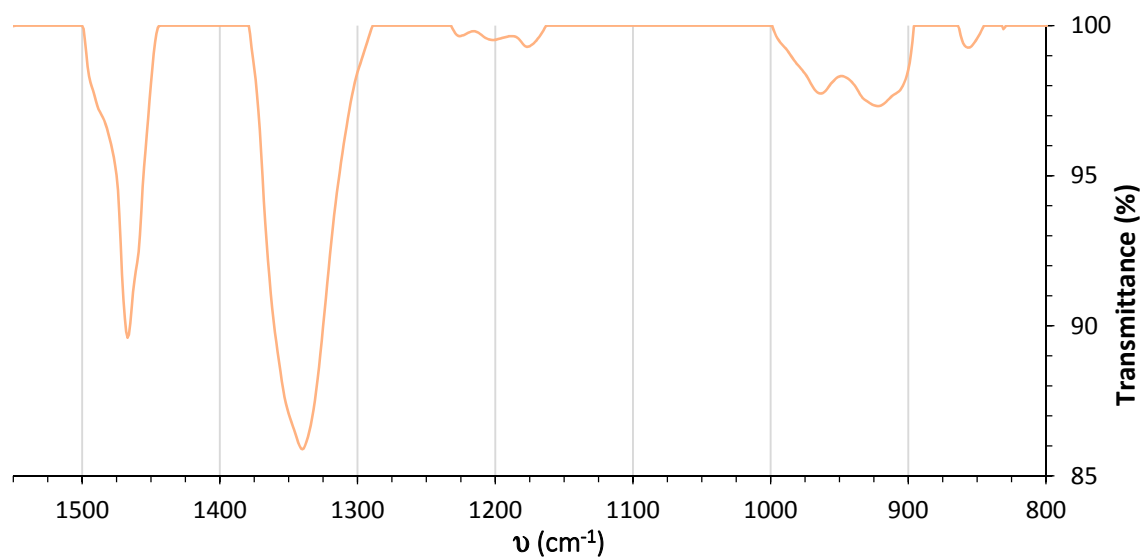

**Table S1: Metal recovery data tabulated as distribution coefficients.**

| Distribution coefficients (REE recovered into org./REE remaining in aq.)    |       |       |       |                                                  |       |      |      |
|-----------------------------------------------------------------------------|-------|-------|-------|--------------------------------------------------|-------|------|------|
| Varying [IL]. Fixed [NaNO <sub>3</sub> ] (7 M)                              |       |       |       | Varying [NaNO <sub>3</sub> ]. Fixed [IL] (0.1 M) |       |      |      |
| [IL] (M)                                                                    | La    | Nd    | Dy    | [NaNO <sub>3</sub> ] (M)                         | La    | Nd   | Dy   |
| 0.01                                                                        | 0.15  | 0.14  | 0.05  | 1.0                                              | 0.03  | 0.02 | ---- |
| 0.02                                                                        | 0.42  | 0.34  | 0.15  | 2.0                                              | 0.23  | 0.08 | ---- |
| 0.05                                                                        | 1.73  | 1.13  | 0.40  | 3.0                                              | 0.98  | 0.36 | 0.05 |
| 0.10                                                                        | 66.17 | 4.03  | 1.06  | 4.0                                              | 4.06  | 0.81 | 0.10 |
| 0.20                                                                        | 86.93 | 9.11  | 2.41  | 5.0                                              | 4.78  | 1.93 | 0.26 |
| 0.50                                                                        | 28213 | 14.96 | 8.40  | 6.0                                              | 10.09 | 3.62 | 0.44 |
| 1.00                                                                        | ----  | 62.98 | 12.18 | 7.0                                              | 66.17 | 4.03 | 1.06 |
| Varying [HNO <sub>3</sub> ]. Fixed [NaNO <sub>3</sub> ] (7 M), [IL] (0.1 M) |       |       |       |                                                  |       |      |      |
| [HNO <sub>3</sub> ] (M)                                                     | La    | Nd    | Dy    |                                                  |       |      |      |
| 0.005                                                                       | 16.78 | 6.11  | 1.47  |                                                  |       |      |      |
| 0.010                                                                       | 12.16 | 3.02  | 1.42  |                                                  |       |      |      |
| 0.020                                                                       | 11.66 | 5.42  | 1.58  |                                                  |       |      |      |
| 0.050                                                                       | 6.96  | 2.27  | 1.09  |                                                  |       |      |      |
| 0.100                                                                       | 3.58  | 2.89  | 0.78  |                                                  |       |      |      |
| 0.200                                                                       | 6.05  | 1.05  | 0.68  |                                                  |       |      |      |
| 0.500                                                                       | 0.60  | 0.15  | 0.10  |                                                  |       |      |      |
| 1.000                                                                       | 0.09  | 0.00  | 0.00  |                                                  |       |      |      |
